# Supplementary material for: Genetic Diversity in 19th Century Barley (Hordeum vulgare) Reflects Differing Agricultural Practices and Seed Trade in Jämtland, Sweden
Source: MDPI journal article supplement (doi:10.3390/d13070315), 2021-07-09
Supplement: s1 [file s1]

Table S3. Results from CLUMPP and Best K for STRUCTURE run of only historical accessions, highest values are highlighted.

| K  | H'       | Ln Prob K=k | Delta    | Ln'     | Ln''    |
|----|----------|-------------|----------|---------|---------|
| 2  | 0.993305 | 2.64E-08    | 72.45281 | 112.36  | 94.47   |
| 3  | 0.972595 | 0.999999974 | 26.30129 | 17.89   | 98.24   |
| 4  | 0.899878 | 2.98E-35    | 2.381037 | -80.35  | 66.61   |
| 5  | 0.869997 | 1.27E-35    | 0.143155 | -13.74  | 5.28    |
| 6  | 0.919504 | 2.87E-40    | 0.11156  | -8.46   | 4.57    |
| 7  | 0.845188 | 5.83E-44    | 0.293668 | -13.03  | 20.18   |
| 8  | 0.821482 | 5.75E-58    | 11.78229 | -33.21  | 564.96  |
| 9  | 0.833986 | 6.05E-97    | 0.781022 | -598.17 | 1032.67 |
| 10 | 0.827986 | 1.20E-109   | 1.400548 | 434.5   | 389.23  |
| 11 | 0.864637 | 9.00E-115   | 8.031912 | 45.27   | 728.93  |
| 12 | 0.896725 | 2.99E-172   |          | -683.66 |         |
