# Supplementary material for: Genetic Diversity in 19th Century Barley (Hordeum vulgare) Reflects Differing Agricultural Practices and Seed Trade in Jämtland, Sweden
Source: MDPI journal article supplement (doi:10.3390/d13070315), 2021-07-09
Supplement: s1 [file s1]

Table S2. Results from CLUMPP and Best K for STRUCTURE run of combined dataset covering Scandinavia, highest values are highlighted.

| K  | H'     | Ln Prob K=k | Delta | Ln'    | Ln''   |
|----|--------|-------------|-------|--------|--------|
| 2  | 0.9851 | 0.00E+00    | 0.25  | 334.92 | 187.65 |
| 3  | 0.9903 | 0.00E+00    | 47.83 | 522.57 | 260.88 |
| 4  | 0.9897 | 1.35E-233   | 2.62  | 261.69 | 77.74  |
| 5  | 0.9840 | 3.17E-156   | 21.35 | 183.95 | 99.51  |
| 6  | 0.9811 | 6.49E-124   | 0.22  | 84.44  | 4.61   |
| 7  | 0.9749 | 2.74E-80    | 0.03  | 79.83  | 1.51   |
| 8  | 0.8203 | 7.57E-48    | 0.41  | 81.34  | 7.79   |
| 9  | 0.9066 | 2.12E-20    | 0.46  | 73.55  | 14.05  |
| 10 | 0.9711 | 1.00E+00    |       | 59.50  |        |
