# Supplementary material for: Genetic Diversity in 19th Century Barley (Hordeum vulgare) Reflects Differing Agricultural Practices and Seed Trade in Jämtland, Sweden
Source: MDPI journal article supplement (doi:10.3390/d13070315), 2021-07-09
Supplement: s1 [file s1]

Table S1. Results from CLUMPP and Best K for STRUCTURE run of extant and historical accessions, highest values are highlighted.

| K  | H'       | Ln Prob K=k | Delta    | Ln'     | Ln''    |
|----|----------|-------------|----------|---------|---------|
| 2  | 0.994364 | 6.40E-80    | 94.24517 | 158.6   | 62.27   |
| 3  | 0.967952 | 8.96E-36    | 2.791874 | 96.33   | 46.8    |
| 4  | 0.982675 | 1.72E-16    | 4.44668  | 49.53   | 12.1    |
| 5  | 0.980052 | 1.00E+00    | 16.49109 | 37.43   | 73.91   |
| 6  | 0.921197 | 1.70E-12    | 0.525064 | -36.48  | 12.94   |
| 7  | 0.875048 | 3.16E-20    | 0.179379 | -23.54  | 7.88    |
| 8  | 0.88261  | 5.14E-34    | 0.92784  | -31.42  | 39.26   |
| 9  | 0.86154  | 1.26E-70    | 0.589231 | -70.68  | 31.13   |
| 10 | 0.86589  | 1.42E-96    | 8.787696 | -39.55  | 503.02  |
| 11 | 0.874242 | 4.89E-92    | 0.024422 | -542.57 | 41.69   |
| 12 | 0.849672 | 6.41E-100   | 0.141375 | -584.26 | 488.9   |
| 13 | 0.883447 | 4.81E-124   | 0.143474 | -95.36  | 496.61  |
| 14 | 0.896003 | 3.33E-136   | 0.082157 | -591.97 | 443.14  |
| 15 | 0.85459  | 2.40E-146   | 0.249096 | -148.83 | 1449.65 |
| 16 | 0.883113 | 1.34E-151   |          | 1300.82 |         |
